# Supplementary material for: Frequency-specific modulation of population-level frequency tuning in human auditory cortex
Source: PubMed Central journal article supplement (PMC2637881; doi:10.1186/1471-2202-10-1), 2009-01-06

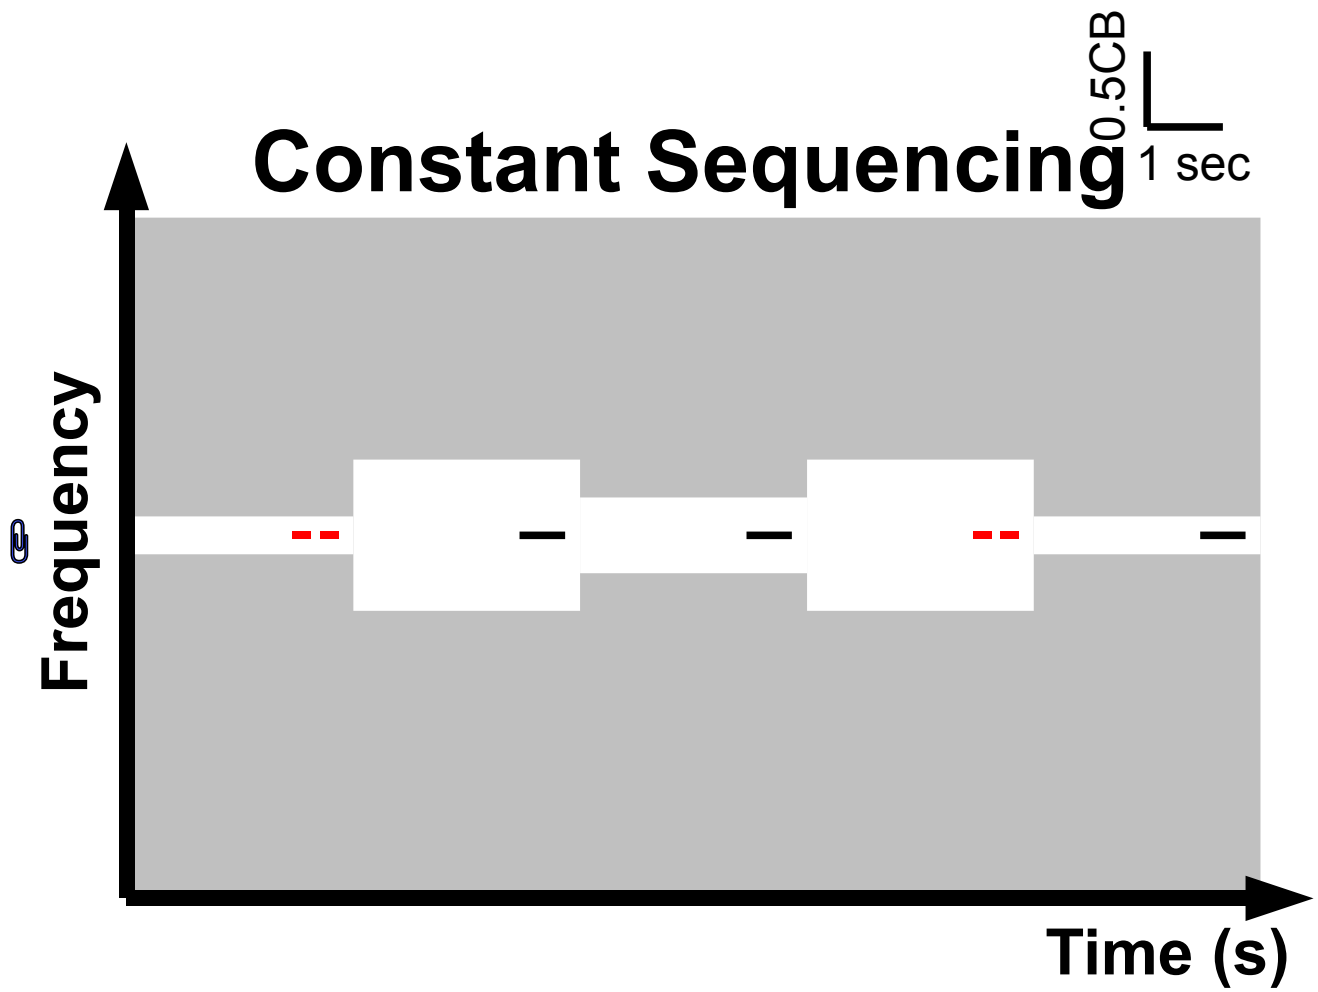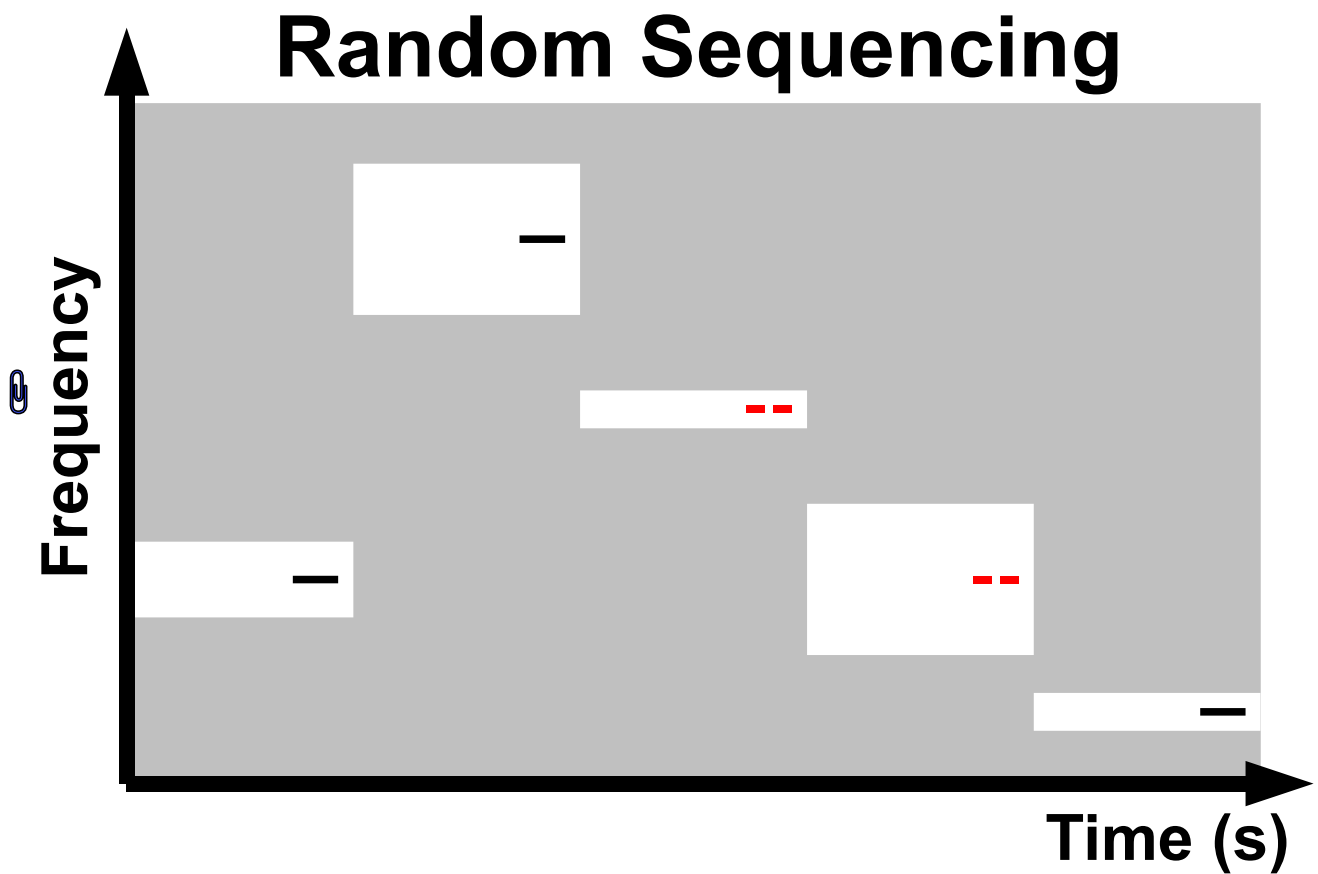

Supplement: 1471-2202-10-1-S1.pdf [file 1471-2202-10-1-S1.pdf]
